# Supplementary material
Source: PubMed Central journal article supplement (PMC6957764)

S1

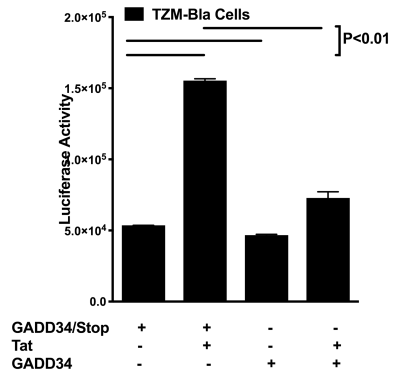

S2

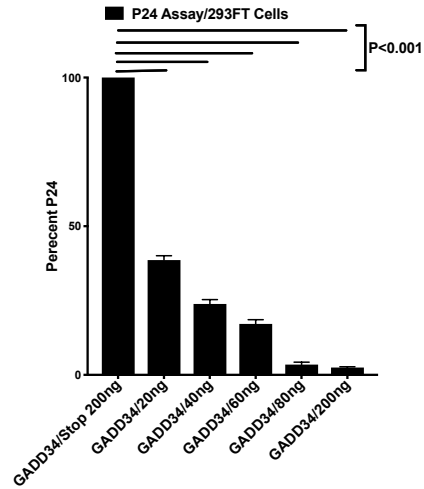

S3

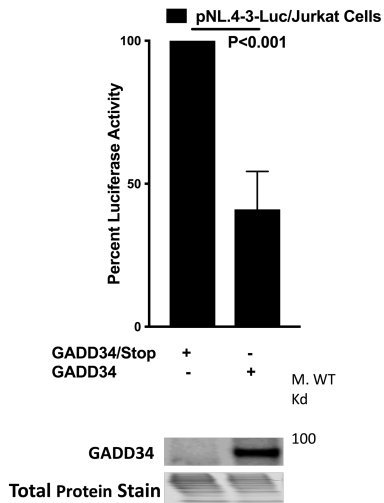

Supplement: NIHMS1545364-supplement-1.pdf [file NIHMS1545364-supplement-1.pdf]
